# Supplementary material for: Protein Hydrolysates and Bioactive Peptides as Mediators of Blood Glucose—A Systematic Review and Meta-Analysis of Acute and Long-Term Studies
Source: MDPI journal article supplement (doi:10.3390/nu16020323), 2024-01-22
Supplement: s1 [file s1]

# Protein Hydrolysates and Bioactive Peptides as Mediators of Blood Glucose—A Systematic Review and Meta-Analysis of Acute and Long-Term Studies

**Table S1.** Database search terms.

| Search Category        | Search Terms Used                                                                                                                                                                                                                                                                                                                                                                               |
|------------------------|-------------------------------------------------------------------------------------------------------------------------------------------------------------------------------------------------------------------------------------------------------------------------------------------------------------------------------------------------------------------------------------------------|
| <b>1. Population</b>   | (normoglycaemic) OR (normoglycaemia) OR (normoglycemia) OR (healthy) OR (normal) OR (diabetic) OR (diabetes) OR (Prediabetic) OR (prediabetes) OR (T2DM) OR (T2D) OR (NIDDM) OR (adults)                                                                                                                                                                                                        |
| <b>2. Intervention</b> | (hydrolysates) OR (bioactive peptides) OR (peptides) OR (hydrolysed protein) OR (protein extracts)                                                                                                                                                                                                                                                                                              |
| <b>3. Control</b>      | (placebo) OR (protein) OR (intact protein) OR (carbohydrates) OR (CHO) OR (casein) OR (whey) OR (protein isolate) OR (protein concentrate)                                                                                                                                                                                                                                                      |
| <b>4. Outcomes</b>     | (glucose) OR (FPG) OR (PPG) OR (glycemic) OR (glycaemia) OR (glycemia) OR (insulin) OR (post-prandial) OR (postprandial) OR (PPGR) OR (OGTT) OR (insulinemic) OR (insulinaemic) OR (HOMA) OR (Homeostatic Model Assessment of Insulin Resistance ) OR insulin resistance) OR (IR) OR (glycated hemoglobin) OR (HbA1c) OR (A1C) OR (A1c) OR (glycated haemoglobin) OR (glycosylated haemoglobin) |

**Table S2.** Risk of bias assessment.

| Study                        | Risk of Bias Assessment |                                      |                      |                            |                                   |               |
|------------------------------|-------------------------|--------------------------------------|----------------------|----------------------------|-----------------------------------|---------------|
|                              | Domain                  |                                      |                      |                            |                                   | Overall       |
|                              | Randomization Process   | Deviation from Intended Intervention | Missing Outcome Data | Measurement of the Outcome | Selection of the Reported Results |               |
| <b>Akhavan et al., 2010</b>  | some concerns           | low risk                             | low risk             | low risk                   | some concerns                     | some concerns |
| <b>Ballard et al., 2009</b>  | some concerns           | low risk                             | low risk             | low risk                   | some concerns                     | some concerns |
| <b>Ballard et al., 2013</b>  | low risk                | low risk                             | some concerns        | low risk                   | low risk                          | some concerns |
| <b>Bendtsen et al., 2014</b> | some concerns           | low risk                             | some concerns        | low risk                   | some concerns                     | some concerns |
| <b>Calbet et al., 2002</b>   | some concerns           | low risk                             | some concerns        | low risk                   | some concerns                     | some concerns |
| <b>Chen, 2020</b>            | some concerns           | low risk                             | low risk             | low risk                   | some concerns                     | some concerns |
| <b>Claessens, 2007</b>       | some concerns           | Some concerns                        | some concerns        | low risk                   | some concerns                     | high risk     |
| <b>Claessens, 2008</b>       | some concerns           | Some concerns                        | low risk             | low risk                   | some concerns                     | some concerns |
| <b>Claessens, 2009</b>       | some concerns           | Some concerns                        | low risk             | low risk                   | low risk                          | some concerns |
| <b>Curran, 2019</b>          | some concerns           | low risk                             | low risk             | low risk                   | some concerns                     | some concerns |
| <b>Dale, 2018</b>            | low risk                | low risk                             | low risk             | low risk                   | low risk                          | low risk      |
| <b>Deglaire, 2009</b>        | low risk                | low risk                             | low risk             | low risk                   | some concerns                     | some concerns |
| <b>Devasia, 2019</b>         | some concerns           | low risk                             | some concerns        | low risk                   | some concerns                     | high risk     |
| <b>Drummond, 2018</b>        | some concerns           | low risk                             | low risk             | low risk                   | some concerns                     | some concerns |
| <b>Geerts, 2011</b>          | some concerns           | low risk                             | low risk             | low risk                   | some concerns                     | some concerns |
| <b>Goudarzi, 2013</b>        | some concerns           | low risk                             | some concerns        | low risk                   | some concerns                     | high risk     |
| <b>Hoefle, 2019</b>          | low risk                | low risk                             | low risk             | low risk                   | some concerns                     | some concerns |

|                            |               |          |               |          |               |               |
|----------------------------|---------------|----------|---------------|----------|---------------|---------------|
| <b>Holmer-Jensen, 2012</b> | some concerns | low risk | low risk      | low risk | some concerns | some concerns |
| <b>Horner, 2019</b>        | low risk      | low risk | low risk      | low risk | some concerns | some concerns |
| <b>Hovaland, 2020</b>      | low risk      | low risk | low risk      | low risk | some concerns | some concerns |
| <b>Jensen, 2020</b>        | some concerns | low risk | low risk      | low risk | some concerns | some concerns |
| <b>Jonker, 2011</b>        | some concerns | low risk | low risk      | low risk | some concerns | some concerns |
| <b>King, 2018</b>          | some concerns | low risk | some concerns | low risk | some concerns | high risk     |
| <b>Koopman, 2009</b>       | some concerns | low risk | some concerns | low risk | some concerns | high risk     |
| <b>Mandres, 2005</b>       | some concerns | low risk | Some concerns | low risk | some concerns | high risk     |
| <b>Mandres, 2006</b>       | low risk      | low risk | low risk      | low risk | some concerns | some concerns |
| <b>Mandres, 2009</b>       | some concerns | low risk | low risk      | low risk | some concerns | some concerns |
| <b>Mandres, 2014</b>       | some concerns | low risk | low risk      | low risk | some concerns | some concerns |
| <b>Mortensen, 2012</b>     | some concerns | low risk | low risk      | low risk | some concerns | some concerns |
| <b>Nakayama, 2018</b>      | some concerns | low risk | low risk      | low risk | some concerns | some concerns |
| <b>Plat, 2019</b>          | low risk      | low risk | low risk      | low risk | some concerns | some concerns |
| <b>Power, 2009</b>         | low risk      | low risk | low risk      | low risk | some concerns | some concerns |
| <b>Rakvaag, 2019</b>       | some concerns | low risk | low risk      | low risk | some concerns | some concerns |
| <b>Sartorius, 2019</b>     | low risk      | low risk | low risk      | low risk | some concerns | some concerns |
| <b>Van-Loon, 2000</b>      | some concerns | low risk | some concerns | low risk | some concerns | high risk     |
| <b>Zhu, 2010</b>           | some concerns | low risk | low risk      | low risk | some concerns | some concerns |

**Table S3.** GRADE assessment.

| Outcome                    | No. of Trials | No. of Participants | Certainty assessment |                      |                      |                             |                      | Effect Estimate       | Grade    |
|----------------------------|---------------|---------------------|----------------------|----------------------|----------------------|-----------------------------|----------------------|-----------------------|----------|
|                            |               |                     | Risk of Bias         | Inconsistency        | Indirectness         | Imprecision                 | Other Considerations |                       |          |
| <b>PPGR normoglycemia</b>  | 15            | 573                 | Not serious          | Not serious          | Serious <sup>b</sup> | Not serious                 | None                 | -0.22 [-0.40, -0.01]  | Moderate |
| <b>PPGR hyperglycaemia</b> | 8             | 342                 | Not serious          | Not serious          | Serious <sup>b</sup> | Not serious                 | None                 | -0.88 [-1.37, -0.39]  | Moderate |
| <b>PPIR normoglycaemia</b> | 12            | 470                 | Not serious          | Serious <sup>a</sup> | Serious <sup>b</sup> | Not serious                 | None                 | 12.98 [2.73, 23.23]   | Low      |
| <b>PPIR hyperglycaemia</b> | 7             | 322                 | Not serious          | Serious <sup>a</sup> | Serious <sup>b</sup> | Not serious                 | None                 | 23.05 [7.53, 38.57]   | Low      |
| <b>FBG</b>                 | 6             | 266                 | Not serious          | Serious <sup>a</sup> | Serious <sup>b</sup> | Serious <sup>c</sup>        | None                 | -0.83 [-1.50, -0.16]  | Very Low |
| <b>HbA<sub>1c</sub></b>    | 3             | 161                 | Not serious          | Serious <sup>a</sup> | Serious <sup>b</sup> | Very serious <sup>e</sup>   | None                 | -7.99 [-11.04, -4.95] | Very Low |
| <b>HOMA-IR</b>             | 6             | 306                 | Not serious          | Serious <sup>a</sup> | Serious <sup>b</sup> | Very serious <sup>c,d</sup> | None                 | -0.71 [-1.58, 0.17]   | Very low |

PPGR, Postprandial Glucose Response; PPIR, Postprandial Insulin Response; FBG, Fasting Blood Glucose; HbA<sub>1c</sub>, Glycated haemoglobin; HOMA-IR, homeostatic model assessment of insulin resistance; a. Due to unexplained variability among the studies; b. Due to variations in the control groups; c. Different arms with same publications or different studies with same authors. d. The 95% confidence interval encompassed both positive effects and adverse effects. e. Due to small number of studies.

a. High heterogeneity between studies that was not improved through further subgroup analyses, meta-regression, or sensitivity analyses.

b. There was no standardized control for all studies. Control varied between carbohydrates, reference popular proteins such as Casein or Whey, isolate protein (unhydrolysed), milk and mixture of protein and amino acids. In addition, the form of the control was different in some studies; some were given as drinks others as tables.

c. Publications bias may occur when including different studies/arms with same authors as authors may consistently report similar findings across multiple studies, there may be a risk of confirmation bias. This occurs when researchers selectively publish or emphasize studies that confirm their hypotheses while neglecting those that do not.

d. No significant change. The change was in the same direction with the intervention, however the 95% confident intervals crossed one (-1.58 to 0.17).

e. only 3 studies were included in the analysis. With a small number of studies, it may be challenging to assess and explain heterogeneity. Even minor differences between studies can disproportionately influence the overall results, and there may not be enough statistical power to detect and understand sources of heterogeneity.

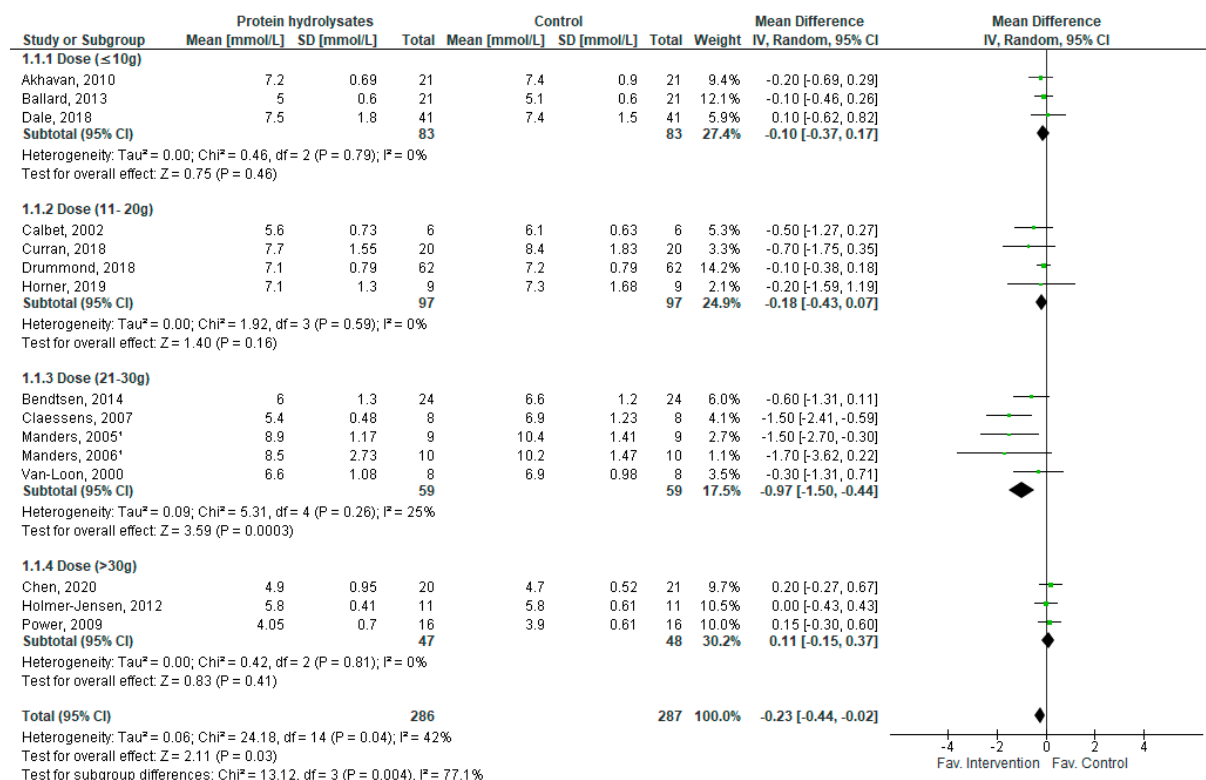

**Figure S1.** Subgroup analysis of acute studies investigating the effect of different doses of protein hydrolysate consumption on postprandial glucose response in adults with normoglycaemia.

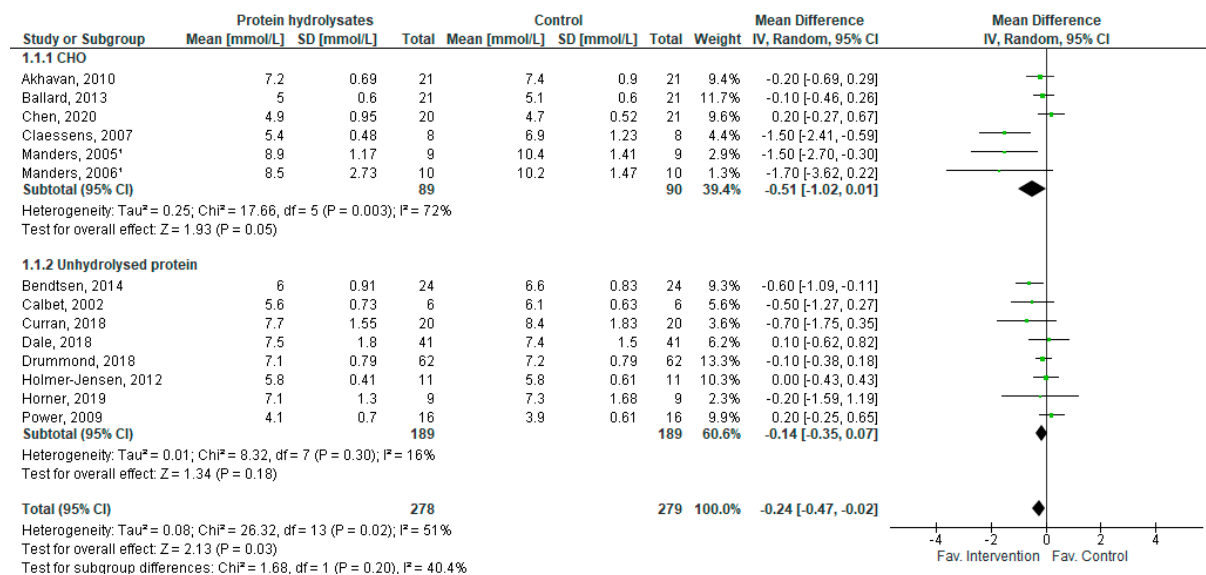

**Figure S2.** Subgroup analysis by control type on acute studies investigating acute glucose response after protein hydrolysates consumption in adults with normoglycaemia.

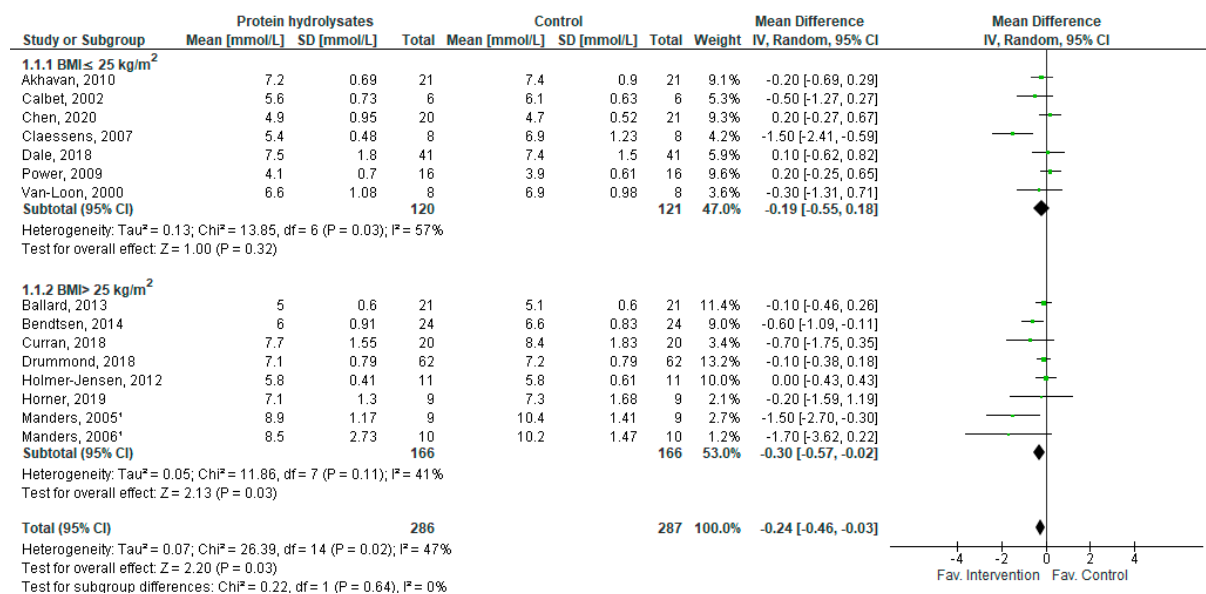

**Figure S3.** Subgroup analysis by BMI on acute studies investigating postprandial glucose response after protein hydrolysates consumption in normoglycaemic adults.

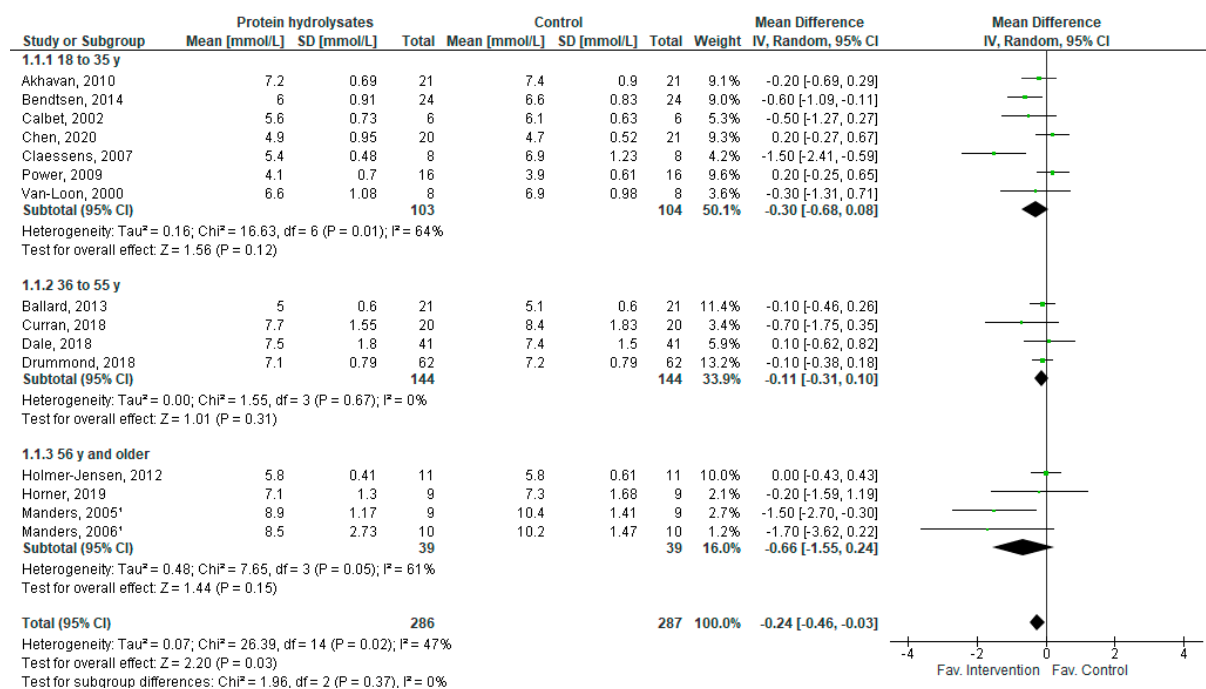

**Figure S4.** Subgroup analysis of acute studies investigating the impact of the participants' age on the postprandial glucose in response to protein hydrolysates consumption in adults with normoglycaemia.

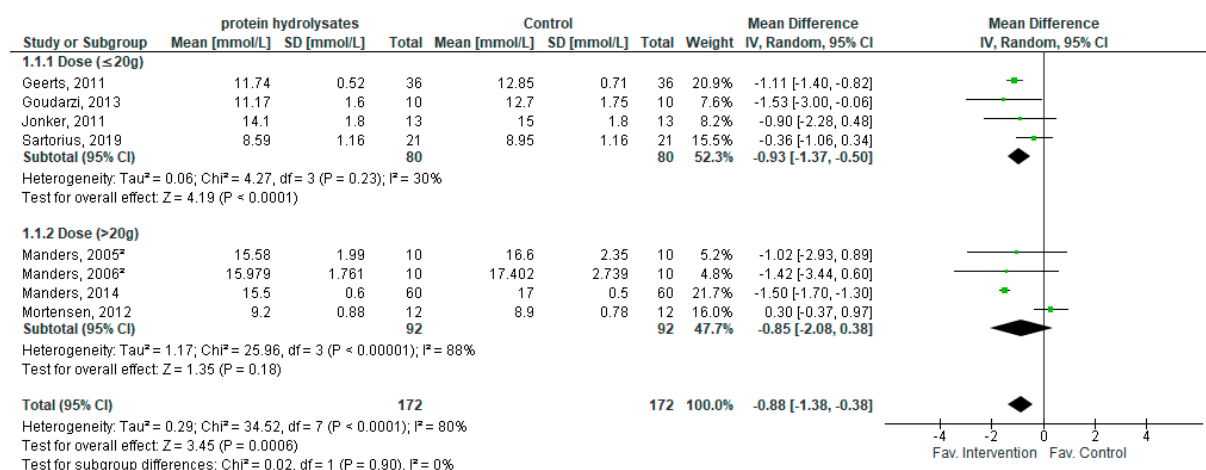

**Figure S5.** Subgroup analysis of acute studies investigating the effect of different doses of protein hydrolysates consumption on postprandial glucose response in adults with hyperglycaemia.

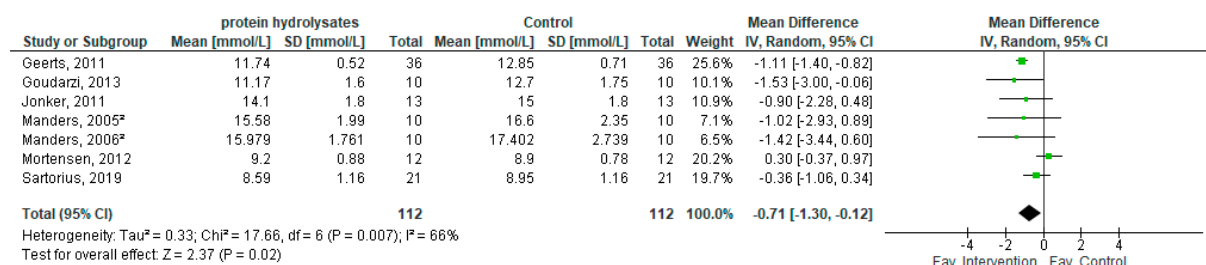

**Figure S6.** Sensitivity analysis by removing one study based on BMI of the studies investigating postprandial glucose response after protein hydrolysates consumption in adults with hyperglycaemia (Only studies BMI $<30$  Kg/m $^2$  were included in this analysis).

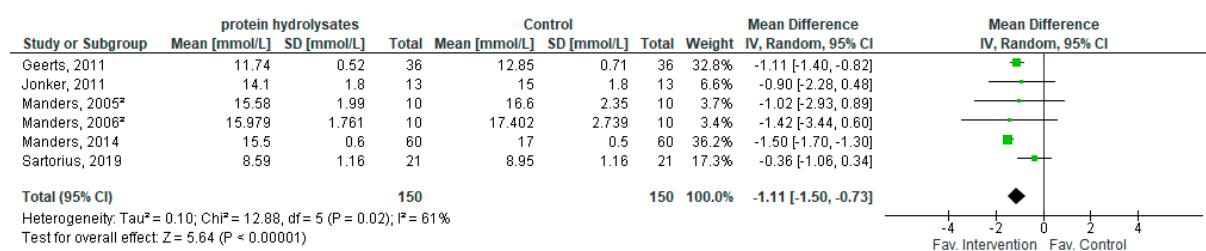

**Figure S7.** Sensitivity analysis by removing two studies based on control type of the studies investigating glucose response after protein hydrolysates consumption in adults with hyperglycaemia (Only studies with CHO control were included in this analysis).

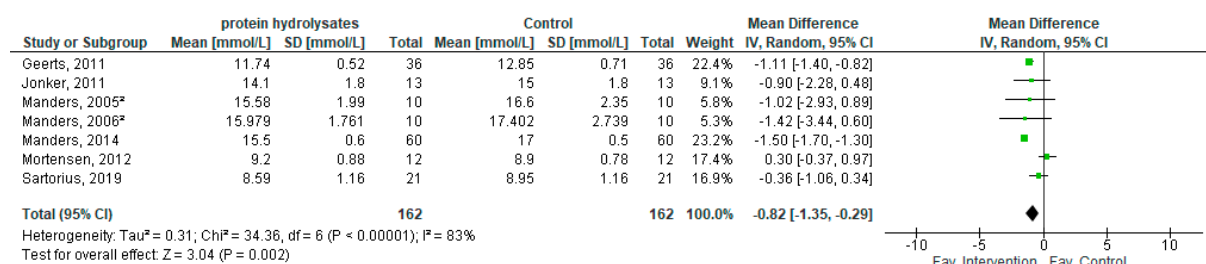

**Figure S8.** Sensitivity analysis by removing one study based on participants' age of the studies investigating postprandial glucose response after protein hydrolysates consumption in adults with hyperglycaemia (Only studies with older adulthood (> 55 years) were included in this analysis).

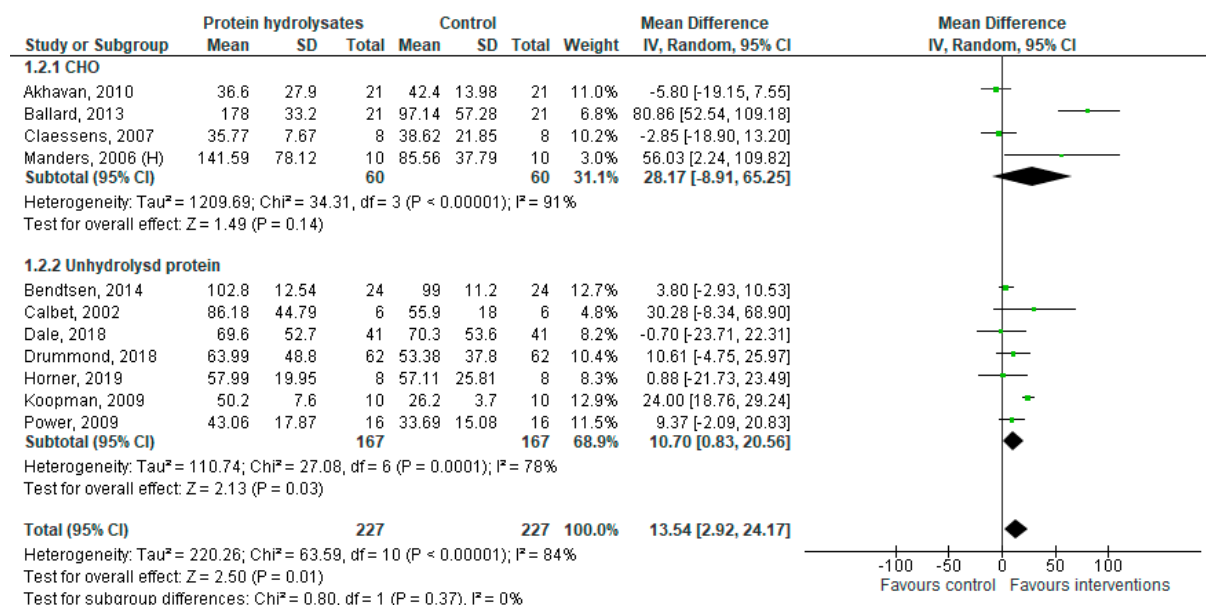

**Figure S9.** Subgroup analysis by control type on acute studies investigating postprandial insulin response after protein hydrolysates consumption in normoglycaemic adults

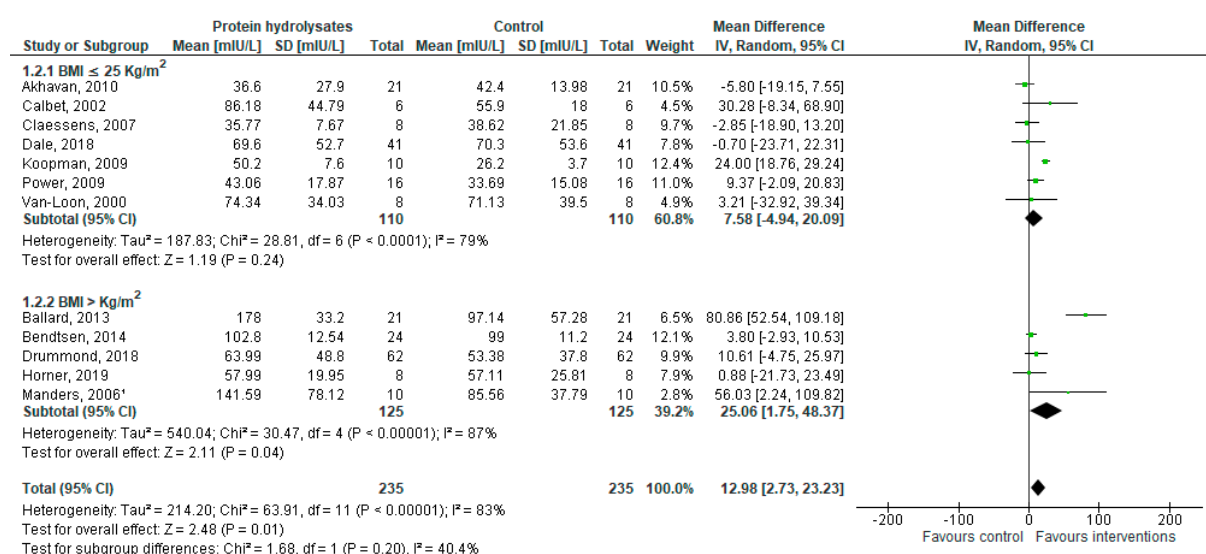

**Figure S10.** Subgroup analysis by BMI on acute studies investigating postprandial insulin response after protein hydrolysates consumption in adults with normoglycaemia.



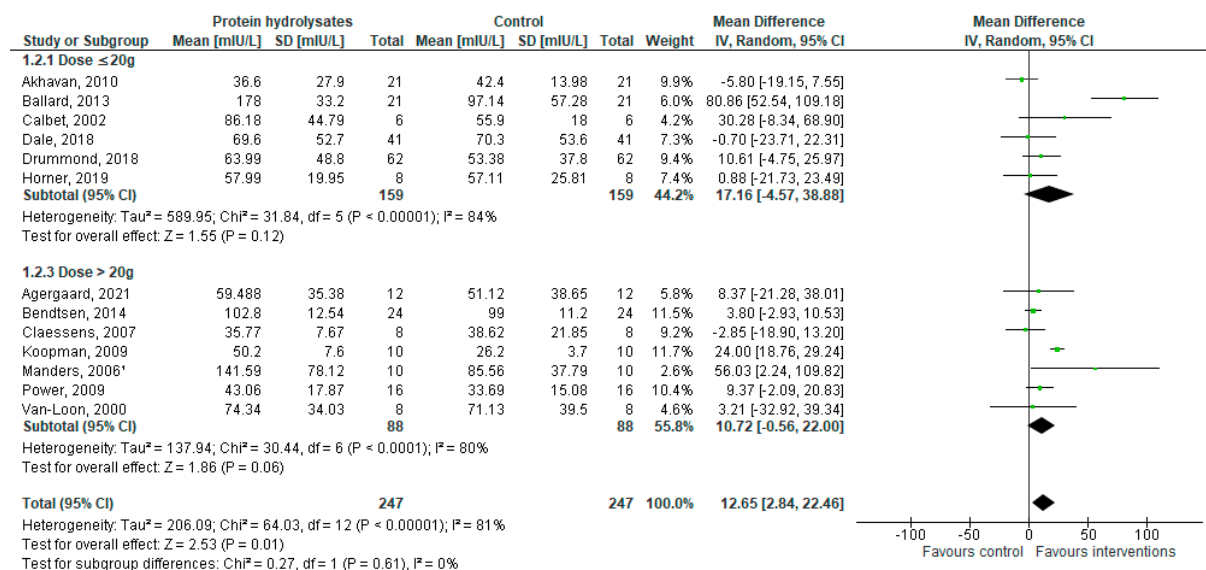

**Figure S11.** Subgroup analysis of acute studies investigating the effect of different doses of protein hydrolysates consumption on postprandial insulin response in adults with normoglycaemia.

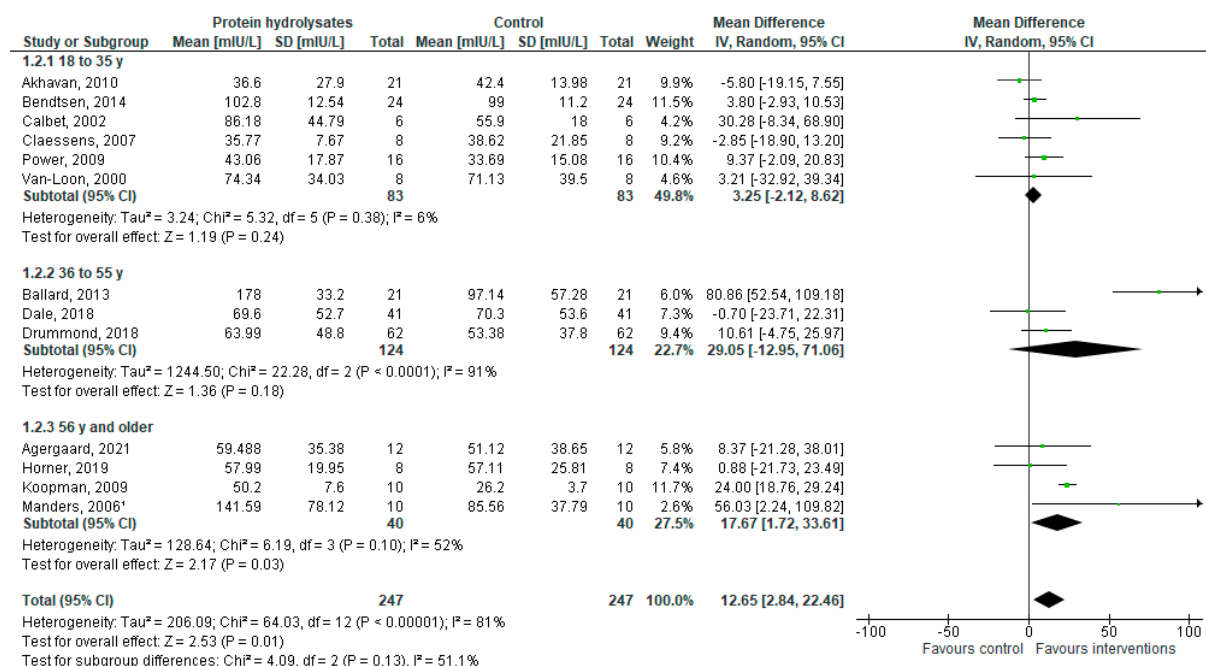

**Figure S12.** Subgroup analysis of acute studies investigating the impact of the participants' age on the postprandial insulin in response to protein hydrolysates consumption in adults with normoglycaemia.

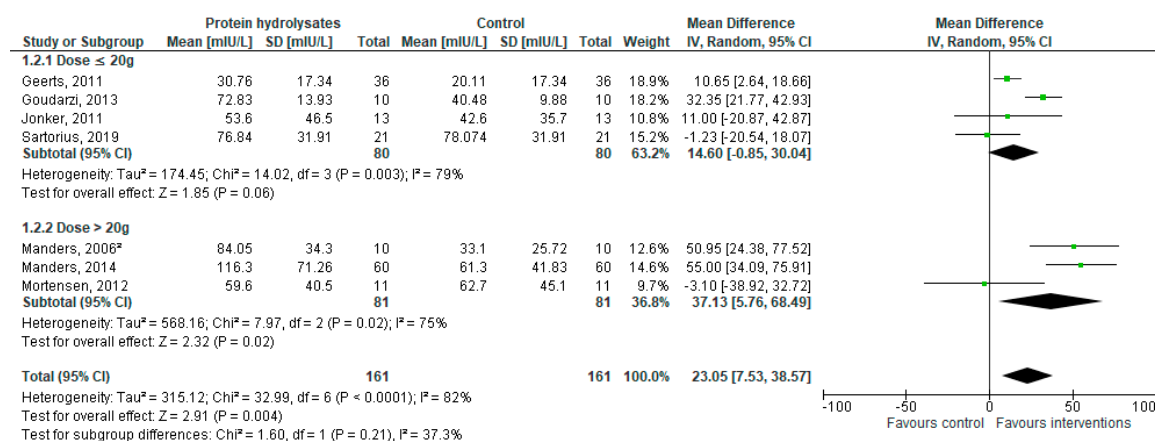

**Figure S13.** Subgroup analysis of acute studies investigating the effect of different doses of protein hydrolysates consumption on postprandial insulin response in adults with hyperglycaemia.

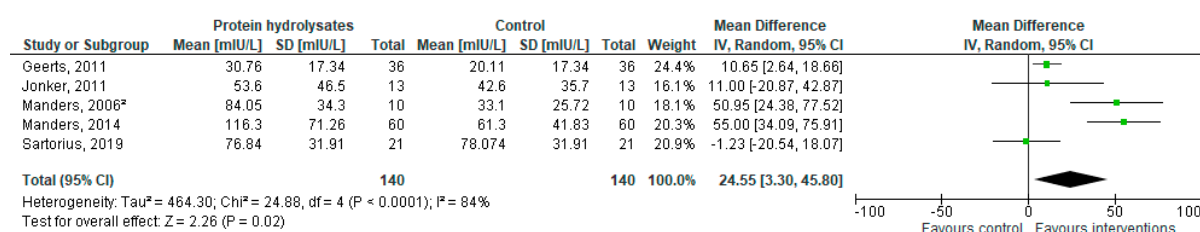

**Figure S14.** Sensitivity analysis by removing two studies based on control type of the studies investigating postprandial insulin response after protein hydrolysates consumption in adults with hyperglycaemia (Only studies with CHO control were included in this analysis).

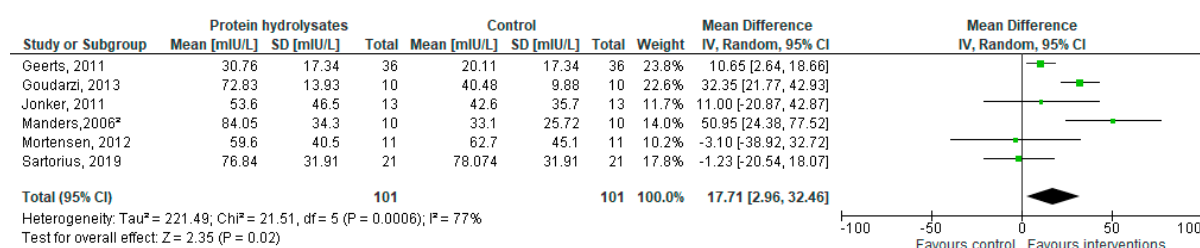

**Figure S15.** Sensitivity analysis by removing one study based on BMI of the studies investigating postprandial insulin response after protein hydrolysates consumption in adults with hyperglycaemia (Only studies BMI < 30 Kg/m<sup>2</sup> were included in this analysis).

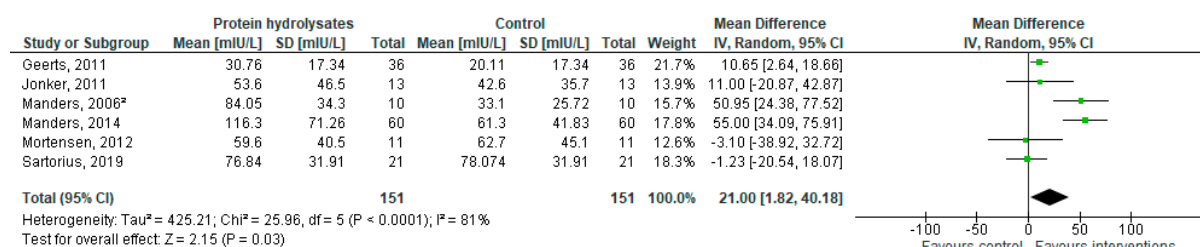

**Figure S16.** Sensitivity analysis by removing one study based on participants' age of the studies investigating postprandial insulin response after protein hydrolysates consumption in adults with hyperglycaemia (Only studies with older adulthood (>55 years) were included in this analysis).

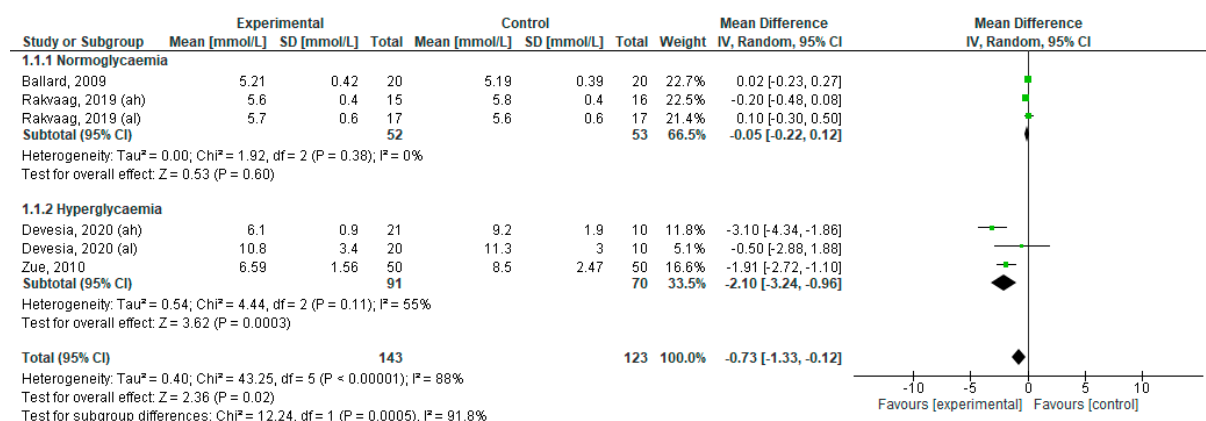

**Figure S17.** Subgroup analysis of long-term studies investigating the impact of the glycaemic status of the participants on fasting glucose levels in response to protein hydrolysates consumption.
